# Supplementary material for: Uncertainty in water transit time estimation with StorAge Selection functions and tracer data interpolation
Source: Copernicus journal article supplement (doi:10.5194/hess-27-2989-2023), 2023-08-14
Supplement: Supplementary file 1 [file hess-27-2989-2023-supplement.pdf]

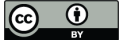

*Supplement of*

## **Uncertainty in water transit time estimation with StorAge Selection functions and tracer data interpolation**

**Arianna Borriero et al.**

*Correspondence to:* Arianna Borriero (arianna.borriero@ufz.de)

The copyright of individual parts of the supplement might differ from the article licence.

## 1 Supplement

**Table S1.** 95% confidence interval of the behavioral SAS parameter ranges for each tested setup.

| Interpolation                            | SAS parameters | $k_Q$ [-]   | $k_{Q1}$ or $\alpha$ [-] | $k_{Q2}$ or $\beta$ [-] | $k_{ET}$ [-] | $S_0$ [mm] |
|------------------------------------------|----------------|-------------|--------------------------|-------------------------|--------------|------------|
| step function<br>kriged $\delta^{18}O_P$ | PLTI           | 0.42 - 1.00 | -                        | -                       | 0.34 - 1.93  | 590 - 2875 |
|                                          | PLTV           | -           | 0.31 - 0.86              | 0.56 - 1.80             | 0.39 - 1.94  | 575 - 2754 |
|                                          | BETATI         | -           | 0.49 - 1.00              | 0.26 - 1.98             | 0.35 - 1.95  | 783 - 2847 |
| step function<br>raw $\delta^{18}O_P$    | PLTI           | 0.50 - 1.01 | -                        | -                       | 0.18 - 1.92  | 600 - 2894 |
|                                          | PLTV           | -           | 0.40 - 0.95              | 0.53 - 1.8              | 0.20 - 1.95  | 618 - 2875 |
|                                          | BETATI         | -           | 0.55 - 0.99              | 1.01 - 1.97             | 0.20 - 1.93  | 788 - 2875 |
| sine function<br>kriged $\delta^{18}O_P$ | PLTI           | 0.36 - 1.56 | -                        | -                       | 0.18 - 1.93  | 335 - 1688 |
|                                          | PLTV           | -           | 0.19 - 1.02              | 0.62 - 1.96             | 0.19 - 1.95  | 335 - 1441 |
|                                          | BETATI         | -           | 0.41 - 1.06              | 0.84 - 1.99             | 0.24 - 1.96  | 411 - 2362 |
| sine function<br>raw $\delta^{18}O_P$    | PLTI           | 0.49 - 1.83 | -                        | -                       | 0.21 - 1.96  | 335 - 1087 |
|                                          | PLTV           | -           | 0.24 - 1.47              | 0.81 - 1.97             | 0.22 - 1.94  | 353 - 1110 |
|                                          | BETATI         | -           | 0.51 - 1.68              | 0.25 - 1.98             | 0.22 - 1.95  | 347 - 1781 |

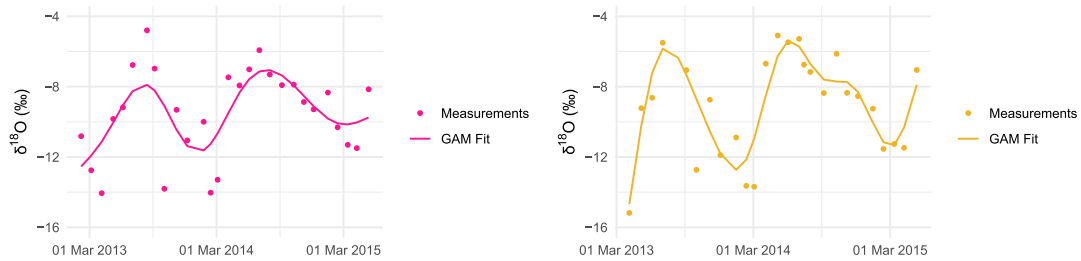

**Figure S1.** Measured (dots) and predicted (line)  $\delta^{18}O_P$  via GAM with kriged (pink) and raw (yellow) data.

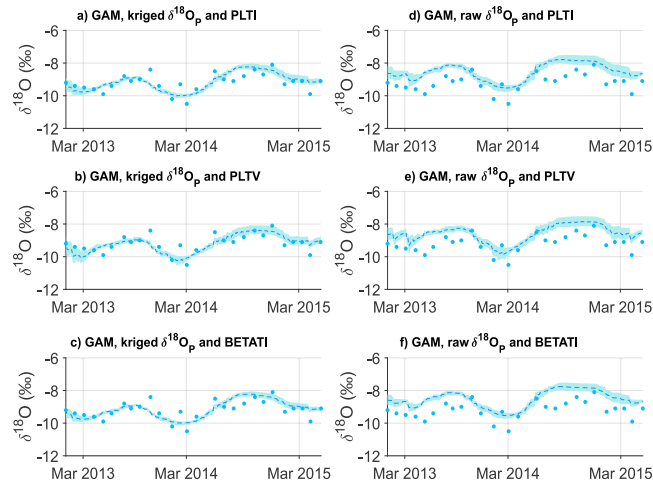

**Figure S2.** Predicted  $\delta^{18}\text{O}$  values in streamflow. The dark blue filled circles represent the observed data, and the dashed light blue lines and shaded areas represent the ensemble mean of all possible solutions and their range according to the 95% CI, respectively.

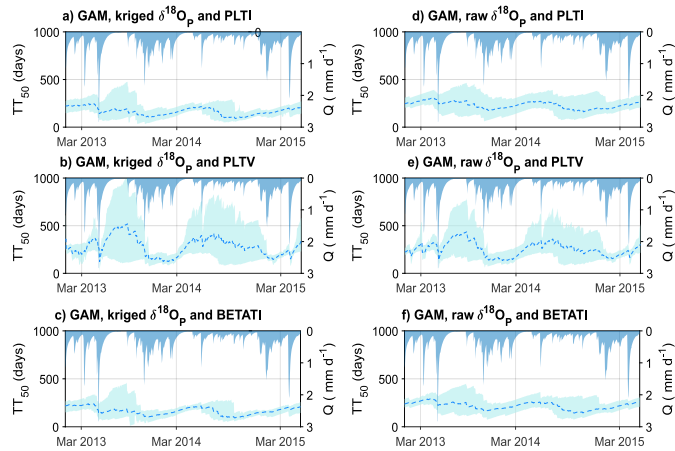

**Figure S3.** Predicted  $\text{TT}_{50}$  of streamflow. The dashed light blue lines and shaded areas represent the ensemble mean of all possible solutions and their range according to the 95% CI, respectively.
